# Supplementary material for: Vitamin D Concentration during Early Pregnancy and Adverse Outcomes among HIV-Negative Women in Dar-es-Salaam, Tanzania: A Case-Control Study
Source: MDPI journal article supplement (doi:10.3390/nu11122906), 2019-12-02
Supplement: s1 [file s1]

## Supplementary Materials

**Table S1:** Distribution of baseline characteristics for each individual pregnancy outcome, Dar-es-Salaam, Tanzania.

| Characteristics                                  | Stillbirth | Controls   | Small for gestation age among live births <sup>1</sup> | Controls   | Premature (birth before 34 weeks) among live births <sup>2</sup> | Controls   |
|--------------------------------------------------|------------|------------|--------------------------------------------------------|------------|------------------------------------------------------------------|------------|
| Overall, n                                       | 36         | 595        | 203                                                    | 392        | 72                                                               | 523        |
| Vitamin D concentration in ng/mL tertiles, n (%) |            |            |                                                        |            |                                                                  |            |
| First (5.71 - 40.03 ng/mL)                       | 18 (50.0)  | 191 (32.1) | 66 (32.5)                                              | 125 (31.9) | 16 (22.2)                                                        | 175 (33.4) |
| Second (40.10 - 46.71 ng/mL)                     | 9 (25.0)   | 206 (34.6) | 75 (37.0)                                              | 131 (33.4) | 32 (44.4)                                                        | 174 (33.3) |
| Third (46.73 - 60.35 ng/mL)                      | 9 (25.0)   | 198 (33.3) | 62 (30.5)                                              | 136 (34.7) | 24 (33.3)                                                        | 174 (33.3) |
| Maternal age in years, mean (SD)                 | 23.0 (3.1) | 22.5 (4.0) | 22.9 (4.4)                                             | 22.3 (3.8) | 22.0 (4.6)                                                       | 22.6 (3.9) |
| Maternal age in years, n (%)                     |            |            |                                                        |            |                                                                  |            |
| ≤ 24                                             | 26 (72.2)  | 447 (75.5) | 137 (68.5)                                             | 310 (79.1) | 58 (81.7)                                                        | 389 (74.7) |
| 25-34                                            | 10 (27.8)  | 135 (22.8) | 58 (29.0)                                              | 77 (19.6)  | 11 (15.5)                                                        | 124 (23.8) |
| ≥ 35                                             | 0          | 10 (1.7)   | 5 (2.5)                                                | 5 (1.3)    | 2 (2.8)                                                          | 8 (1.5)    |
| Gestational age in weeks, mean(SD) <sup>3</sup>  | 9.9 (2.5)  | 9.8 (2.4)  | 10.0 (2.4)                                             | 9.7 (2.4)  | 9.5 (2.3)                                                        | 9.9 (2.4)  |
| Employment, n (%)                                |            |            |                                                        |            |                                                                  |            |
| Employed <sup>4</sup>                            | 7 (19.4)   | 173 (29.2) | 51 (25.2)                                              | 122 (31.3) | 27 (37.5)                                                        | 146 (28.1) |
| Unemployed                                       | 23 (63.9)  | 339 (57.3) | 124 (61.4)                                             | 215 (55.1) | 41 (56.9)                                                        | 298 (57.3) |
| Other                                            | 6 (16.7)   | 80 (13.5)  | 27 (13.4)                                              | 53 (13.6)  | 4 (5.6)                                                          | 76 (14.6)  |
| Marital status, n (%)                            |            |            |                                                        |            |                                                                  |            |
| Living single <sup>5</sup>                       | 2 (5.7)    | 66 (11.1)  | 18 (8.9)                                               | 48 (12.2)  | 12 (16.7)                                                        | 54 (10.3)  |
| Married or cohabitating                          | 33 (94.3)  | 528 (88.9) | 185 (91.1)                                             | 344 (87.8) | 60 (83.3)                                                        | 469 (89.7) |
| Years of education, n (%)                        |            |            |                                                        |            |                                                                  |            |
| 0 - 7                                            | 27 (75.0)  | 432 (72.6) | 151 (74.4)                                             | 281 (71.7) | 57 (79.2)                                                        | 375 (71.7) |
| 8 - 11                                           | 8 (22.2)   | 136 (22.9) | 44 (21.7)                                              | 92 (23.5)  | 14 (19.4)                                                        | 122 (23.3) |
| ≥ 12                                             | 1 (2.8)    | 27 (4.5)   | 8 (3.9)                                                | 19 (4.8)   | 1 (1.4)                                                          | 26 (5.0)   |
| Wealth quartile, n (%)                           |            |            |                                                        |            |                                                                  |            |
| 1 (Lowest)                                       | 4 (12.5)   | 134 (23.8) | 52 (26.8)                                              | 82 (22.3)  | 11 (15.5)                                                        | 123 (25.0) |
| 2                                                | 9 (28.1)   | 137 (24.4) | 44 (22.7)                                              | 93 (25.3)  | 11 (15.5)                                                        | 126 (25.7) |
| 3                                                | 12 (37.5)  | 180 (32.0) | 67 (34.5)                                              | 113 (30.7) | 25 (35.2)                                                        | 155 (31.6) |

|                                                 |            |            |            |            |            |            |
|-------------------------------------------------|------------|------------|------------|------------|------------|------------|
| 4 (Highest)                                     | 7 (21.9)   | 111 (19.8) | 31 (16.0)  | 80 (21.7)  | 24 (33.8)  | 87 (17.7)  |
| Number of previous pregnancies, n (%)           |            |            |            |            |            |            |
| First                                           | 18 (50.0)  | 286 (48.1) | 110 (54.2) | 176 (44.9) | 41 (56.9)  | 245 (46.9) |
| Second                                          | 18 (50.0)  | 309 (51.9) | 93 (45.8)  | 216 (55.1) | 31 (43.1)  | 278 (53.1) |
| Vitamin A supplements, n (%)                    |            |            |            |            |            |            |
| Not received                                    | 21 (58.3)  | 302 (50.8) | 101 (49.8) | 201 (51.3) | 31 (43.1)  | 271 (51.8) |
| Received                                        | 15 (41.7)  | 293 (49.2) | 102 (50.2) | 191 (48.7) | 41 (56.9)  | 252 (48.2) |
| Zinc supplements, n (%)                         |            |            |            |            |            |            |
| Not received                                    | 15 (41.7)  | 297 (49.9) | 102 (50.2) | 195 (49.7) | 38 (52.8)  | 259 (49.5) |
| Received                                        | 21 (58.3)  | 298 (50.1) | 101 (49.8) | 197 (50.3) | 34 (47.2)  | 264 (50.5) |
| Body mass index (kg/m <sup>2</sup> ), mean (SD) | 23.8 (3.8) | 22.7 (4.2) | 22.2 (4.0) | 23.0 (4.3) | 22.3 (3.4) | 22.8 (4.3) |
| Body mass index (kg/m <sup>2</sup> ), n (%)     |            |            |            |            |            |            |
| Underweight                                     | 1 (2.8)    | 68 (11.5)  | 27 (13.4)  | 41 (10.5)  | 9 (12.7)   | 59 (11.3)  |
| Normal                                          | 25 (69.4)  | 401 (67.7) | 141 (69.8) | 260 (66.7) | 48 (67.6)  | 353 (67.8) |
| Overweight or obese                             | 10 (27.8)  | 123 (20.8) | 34 (16.8)  | 89 (22.8)  | 14 (19.7)  | 109 (20.9) |
| Haemoglobin in g/dL, mean (SD)                  | 11.3 (1.5) | 11.5 (1.5) | 11.6 (1.5) | 11.4 (1.4) | 10.9 (1.5) | 11.5 (1.5) |
| Anaemia status, n (%)                           |            |            |            |            |            |            |
| Normal Hb ( $\geq 11.0$ g/dL)                   | 21 (58.3)  | 399 (68.9) | 139 (70.6) | 260 (68.1) | 40 (56.3)  | 359 (70.7) |
| Anaemic ( $< 11.0$ g/dL)                        | 15 (41.7)  | 180 (31.1) | 58 (29.4)  | 122 (31.9) | 31 (43.7)  | 149 (29.3) |

<sup>1</sup> Small for gestational age was defined as birth weight below 10th percentile based on Intergrowth standards.

<sup>2</sup> Premature delivery in this analysis does not include early premature (birth before 30 weeks).

<sup>3</sup> Gestational age at enrollment based on last menstrual period.

<sup>4</sup> Employed include skilled, unskilled and informal employment.

<sup>5</sup> Living single includes never married, divorced, separated and widow.



**Table S2:** The distribution of vitamin D concentration tertiles among cases of adverse pregnancy outcomes and controls in Dar-es-Salaam, Tanzania.

| Characteristics                                 | Cases (Either stillbirth <sup>1</sup> ,<br>premature <sup>2</sup> or SGA <sup>3</sup> ) | Controls   |
|-------------------------------------------------|-----------------------------------------------------------------------------------------|------------|
| Overall, n                                      | 310                                                                                     | 321        |
| Vitamin D concentration tertile in ng/mL, n (%) |                                                                                         |            |
| First (5.71 - 40.03 ng/mL)                      | 100 (32.3)                                                                              | 109 (34.0) |
| Second (40.10 - 46.71 ng/mL)                    | 115 (37.1)                                                                              | 100 (31.1) |
| Third (46.73 - 60.35 ng/mL)                     | 95 (30.6)                                                                               | 112 (34.9) |

<sup>1</sup> Stillbirth does not include miscarriage.

<sup>2</sup> Premature delivery in this analysis does not include premature stillbirth and early premature (birth before 30 weeks).

<sup>3</sup> Small for gestational age as defined by below 10th percentile based on Intergrowth standards.

<sup>4</sup> Gestational age at enrollment based on last menstrual period.

**Table S3:** Relationships of the composite and individual adverse pregnancy outcomes and vitamin D concentration tertiles during early pregnancy, Dar-es-Salaam, Tanzania<sup>1</sup>

| Exposure of interest                              | Unadjusted<br>OR <sup>2</sup> [95% CI <sup>3</sup> ] | P-value | Adjusted<br>OR <sup>2</sup> [95% CI <sup>3</sup> ] | P-value |
|---------------------------------------------------|------------------------------------------------------|---------|----------------------------------------------------|---------|
| Composite outcome <sup>4</sup>                    |                                                      |         |                                                    |         |
| Vitamin D concentration in ng/mL<br>tertiles      |                                                      |         |                                                    |         |
| First (5.71 – 40.03 ng/mL)                        | 1.08 [0.74, 1.59]                                    | 0.69    | 1.05 [0.70, 1.58]                                  | 0.80    |
| Second (40.10 – 46.71 ng/mL)                      | 1.36 [0.93, 1.99]                                    | 0.12    | 1.36 [0.92, 2.03]                                  | 0.13    |
| Third (46.73 – 60.35 ng/mL)                       | Ref                                                  |         | Ref                                                |         |
| Stillbirth                                        |                                                      |         |                                                    |         |
| Vitamin D concentration tertile in<br>ng/mL       |                                                      |         |                                                    |         |
| First (5.71 - 40.03 ng/mL)                        | 2.06 [0.91, 4.70]                                    | 0.08    | 2.46 [1.12, 5.43]                                  | 0.03    |
| Second (40.10 - 46.71 ng/mL)                      | 1.05 [0.41, 2.69]                                    | 0.93    | 1.05 [0.44, 2.53]                                  | 0.91    |
| Third (46.73 - 60.35 ng/mL)                       | Ref                                                  |         | Ref                                                |         |
| Premature (birth before 34<br>weeks) <sup>5</sup> |                                                      |         |                                                    |         |
| Vitamin D concentration tertile in<br>ng/mL       |                                                      |         |                                                    |         |
| First (5.71 - 40.03 ng/mL)                        | 0.68 [0.35, 1.31]                                    | 0.25    | 0.75 [0.39, 1.47]                                  | 0.40    |
| Second (40.10 - 46.71 ng/mL)                      | 1.43 [0.81, 2.51]                                    | 0.22    | 1.44 [0.81, 2.58]                                  | 0.22    |
| Third (46.73 - 60.35 ng/mL)                       | Ref                                                  |         | Ref                                                |         |
| Small for gestational age <sup>6</sup>            |                                                      |         |                                                    |         |
| Vitamin D concentration tertile in<br>ng/mL       |                                                      |         |                                                    |         |
| First (5.71 - 40.03 ng/mL)                        | 1.12 [0.74, 1.67]                                    | 0.60    | 1.06 [0.69, 1.61]                                  | 0.79    |
| Second (40.10 - 46.71 ng/mL)                      | 1.32 [0.89, 1.96]                                    | 0.17    | 1.32 [0.88, 1.99]                                  | 0.18    |
| Third (46.73 - 60.35 ng/mL)                       | Ref                                                  |         | Ref                                                |         |

<sup>1</sup> Adjusted models included maternal age, employment status, wealth quartile, zinc supplement, vitamin A supplement, number of previous pregnancies, body mass index, and anaemia status.

<sup>2</sup> OR is odds ratio.

<sup>3</sup> CI is confidence interval.

<sup>4</sup> The composite of stillbirths, premature births before 34 weeks and SGA births

<sup>5</sup> Premature delivery in this analysis does not include birth before 30 weeks.

<sup>6</sup> Small for gestational age is defined as birth weight below the 10th percentile based on Intergrowth standards.
